# Supplementary material for: Selection, identification, and characterization of aptamers for pro-gastrin-releasing peptide (31–98), a tumor marker for small cell lung cancer
Source: Royal Society of Chemistry journal article supplement (doi:10.1039/c5ra24703a), 2015-12-17
Supplement: c5ra24703a1.pdf [file c5ra24703a1.pdf]

## Selection, Identification, and Characterization of Aptamers for Pro-Gastrin-Releasing Peptide (31-98), a Tumor Marker for Small Cell Lung Cancer

Hui-Fang Cui<sup>a,\*</sup>, Ya-Jun Li<sup>a</sup>, Jia Wang<sup>a</sup>, Xiao-Jia Li<sup>a</sup>, Qiong-Lin Wang<sup>a</sup>, Yan-Feng Bai<sup>a</sup>

<sup>a</sup> Department of Bioengineering, School of Life Sciences, Zhengzhou University, 100# Science Avenue, Zhengzhou, 450001, PR China

\*To whom correspondence should be addressed. Tel: +86-371-67781325; Fax: +86-371-67783235; Email: hfcui@zzu.edu.cn

### 1. In vitro selection, separation and sequence analysis of DNA aptamers for ProGRP<sub>31-98</sub>

The map and the construct of the *pEASY-T3* cloning vector are shown in Figure S-1.

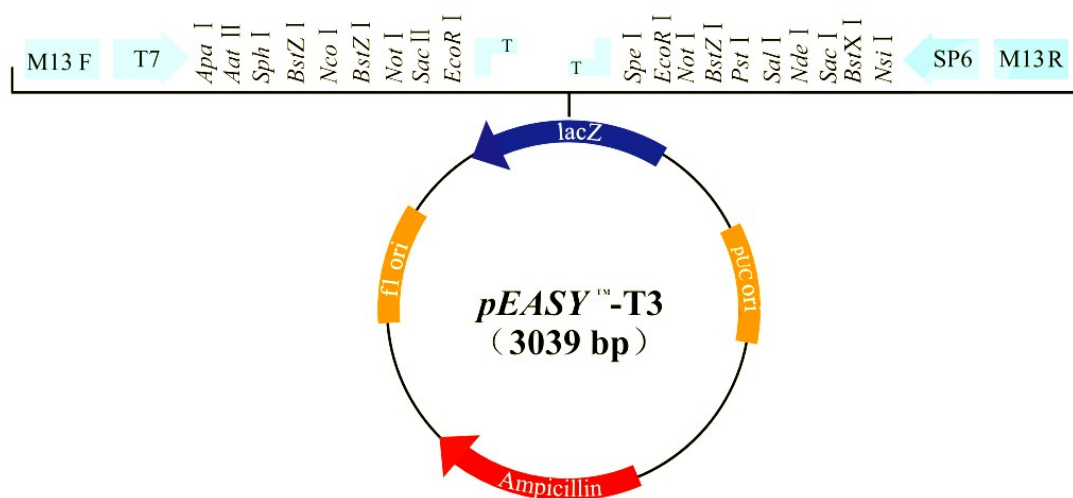

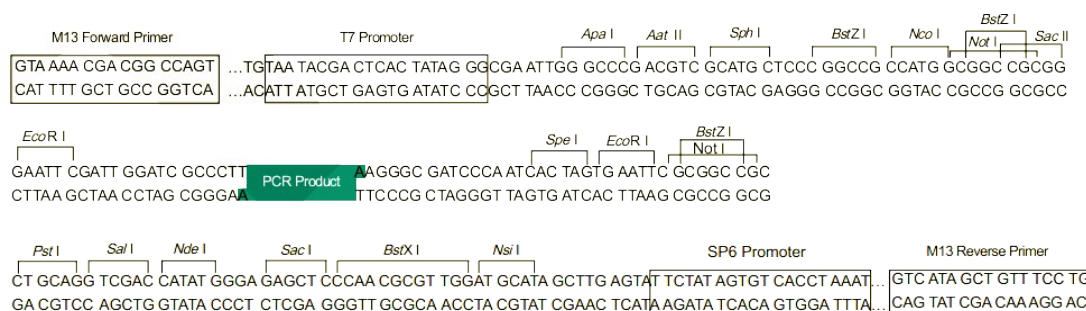

Figure S-1. The map and the construct of the *pEASY-T3* cloning vector.

## 2. Affinity assay and aptasensing of the DNA aptamers to ProGRP<sub>31-98</sub>

The affinities of the aptamer A18, A18', A18'', and A18''' to ProGRP<sub>31-98</sub> were investigated. The calibration plot of the FAM labeled A18 fluorescence intensity versus the aptamer concentration, and the plot of  $1/C_b$  versus  $1/C_0$  of the aptamer A18 in the affinity assay experiment were illustrated (Figure S-2, S-3, respectively).

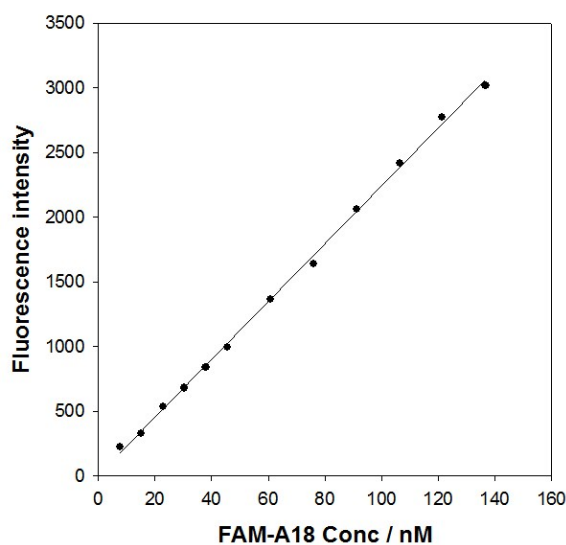

Figure S-2. The calibration plot of the FAM labeled A18 fluorescence intensity versus the aptamer concentration.

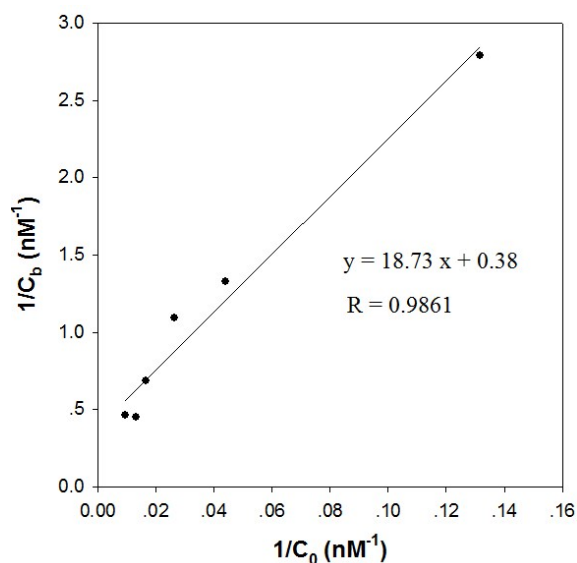

Figure S-3. The plot of  $1/C_b$  versus  $1/C_0$  of the aptamer A18 in the ProGRP<sub>31-98</sub> affinity measurement experiment.  $C_b$  and  $C_0$  are referred to the aptamer concentration of added and bound, respectively, in the incubation of the ProGRP<sub>31-98</sub> coated magnetic beads in the aptamer solution.

The obtained aptamers were tentatively applied for label-free aptasensing using ECL measurement with  $[\text{Ru}(\text{bpy})_2\text{dppz}]^{2+}$  as the probe. The ECL intensity—potential curves of the  $[\text{Ru}(\text{bpy})_2\text{dppz}]^{2+}$ /aptamer complex under the titration of ProGRP<sub>31-98</sub> were recorded, and those for A18'' and A18''' are illustrated in Figure S-4A and S-4B respectively.

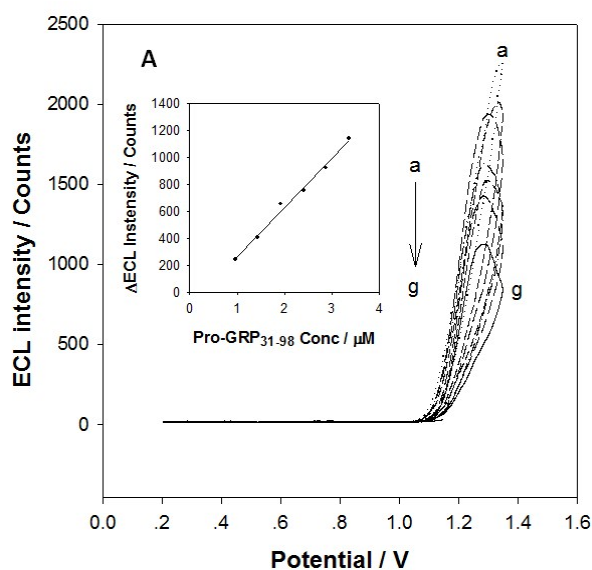

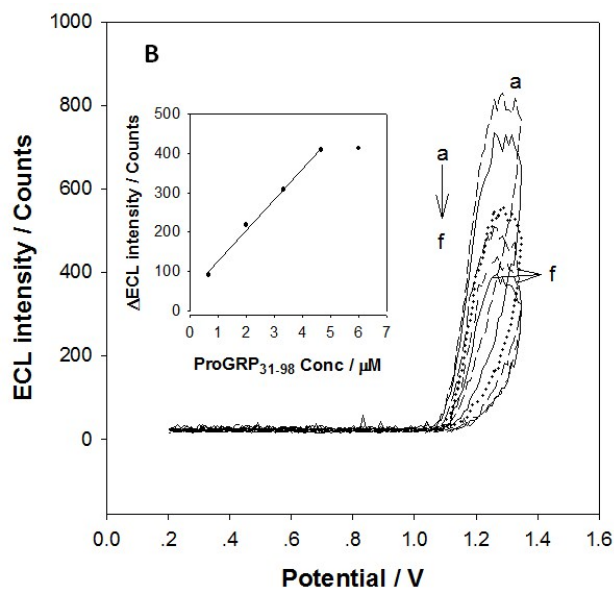

Figure S-4. The ECL intensity—potential curves of the [Ru(bpy)<sub>2</sub>dppz]<sup>2+</sup>/aptamer complex at a GC electrode in 5 mM oxalate/oxalic acid solution (pH = 5.5) containing 1 μM aptamer and 20 μM [Ru(bpy)<sub>2</sub>dppz]<sup>2+</sup> for aptamer (A) A18'', and (B) A18'''' under the titration with ProGRP<sub>31-98</sub>. The PMT was biased at 1200 V. Insets: The plots of the changes of the [Ru(bpy)<sub>2</sub>dppz]<sup>2+</sup>/aptamer complex ECL peak values versus the ProGRP<sub>31-98</sub> concentration.
